# Supplementary material
Source: HighWire-hosted journal article supplement (https://sit.bmj.com/highwire/filestream/336/field_highwire_adjunct_files/4/bmjsit-2021-000088supp005_data_supplement.xlsx)
Supplement: bmjsit-2021-000088supp005_data_supplement.xlsx [file bmjsit-2021-000088supp005_data_supplement.xlsx]

## Sheet: Supp. Table 5
Supplementary Table 5: Perfusion assessment in reconstructive surgery
Ref. No.	Author	Country	Journal	Year	Study design	Patient selection		Imaging techniques						Endpoint measures				Adverse effects	Learning curve	Cost analysis	Other comments	Ref. detail
						Subject	N (cases)	Fluorogenic agent	Dose	Route	Timing	Imaging system	Quantitative measurement	Main endpoints	Imaging accuracy/success rate	Clinical impact, changes in intraoperative decision-making	Clinical impact, advantages in postoperative outcomes
1	Holm	Germany	Br J Plast Surg	2002	Prospective	Pedicled skin-flap surgery (groin, sural island, rectus abdominis, forearm, forehead, and other locales)	13	ICG	0.5 mg/kg in 5% dextrose (2 mg/mL)	IV	Shortly after suturing the flap	NA	Fluorescence intensity	Intraoperative evaluation of skin-flap perfusion	NA	NA	NA	NA	NA	NA	ICG filling defects are associated with delayed wound-healing from sloughing and epitheliolysis	Holm C, Mayr M, Hofter E, Becker A, Pfeiffer UJ, Muhlbauer W. Br J Plast Surg. 2002 Dec;55(8):635-44. doi: 10.1054/bjps.2002.3969.
2	Yamaguchi	Italy	Ann Plast Surg	2004	Prospective	Unipedicled TRAM flap for breast reconstruction	10	ICG	0.5 mg/kg	IV	Immediately after flap dissection	IC-View (Pulsion)	Fluorescence intensity	Assess the effects of intraoperative ICG-VA on clinical outcome of flap	NA	All cases exhibited areas of poor perfusion, but the authors do not specify whether this altered the treatment plan	Healing was uneventful, with one case of epitheliolysis	None	NA	NA		Yamaguchi S, De Lorenzi F, Petit JY, Rietjens M, Garusi C, Giraldo A, Rey PC, Urban C, Martella S, Bosco R. Ann Plast Surg. 2004 Sep;53(3):205-9. doi: 10.1097/01.sap.0000116284.51679.ea.
3	Holm	Germany	J Plast Reconstr Aesthet Surg	2007	Prospective	Superficial inferior epigastric artery (SIEA) flap	10	ICG	0.5mg/kg	IV	After having raised the flap completely on unilateral superficial system	IC-View (Pulsion)	NA	Feasibility	Perfusion of Hartrampf Zone II (8%) and IV (0%) was reduced, compared to Zone III (89%) and Zone I (80%) P<0.0001	NA	NA	None	NA	NA		Holm C, Mayr M, Höfter , Ninkovic M. J Plast Reconstr Aesthet Surg. 2007;60(8):946-51
4	Holm	Germany	Plast Reconstruct Surg	2008	Prospective	Superficial Inferior Epigastric Artery (SIEA) flap	25	ICG	0.5mg/kg	IV	After having raised the flap on the superficial and deep system	IC-View (Pulsion)	NA	Changes in the surgical plan	NA	ICGA changed the operation plan in 44% of subjects to either a bipedicled flap or a DIEP flap	12% postoperative complications	None	NA	NA		Holm C, Mayr M, Höfter E, Raab N, Ninkovic M. Plast Reconstr Surg. 2008 Dec;122(6):1612-20
5	Pestana	US	Plast Reconstruct Surg	2009	Prospective	Free tissue transfer for head and neck, breast and lower extremity reconstructions	27	ICG	10 mg	IV	After flap inset	Spy Imaging (Novadaq Technologies)	NA	Flap loss	NA	NA	1/29 free tissue-transfers in 27 patients was loss requiring operative revision.	None	NA	NA		Pestana IA, Coan B, Erdmann D, Marcus J, Levin LS, Zenn MR. Plast Reconstr Surg. 2009 Apr;123(4):1239-44.
6	Komorowska-Timek	US	Plast Reconstr Surg	2010	Retrospective	Alloplastic and autologous breast reconstruction	20	ICG	10 mg	IV	Alloplastic: After mastectomy and after TE inset Autologous: After flap inset	Spy Imaging (Novadaq Technologies)	NA	Complications	NA	70% intraoperative interveintions based on ICG angiography	ICG decreased postopertive complication rate (4% versus 15.1%, P<0.001)	None	NA	NA	Compared with 148 historical controls	Komorowska-Timek E, Gurtner GC. Plast Reconstr Surg. 2010 Apr;125(4):1065-73.
7	Newman	US	J Reconstr Microsurg	2010	Retrospective	Breast reconstruction with tissue-expanders and TRAM	12	ICG	NA	IV	Subsequent to the removal of breast tissue	Spy Imaging (Novadaq Technologies)	Fluorescence intensity (SPY-Q analysis software)	Wound-healing complications	95% correlation between intraoperative imaging and clinical course with 100% sensitivity and 91% specificity. There was a false-positive rate of 9%.	NA	NA	None	NA	NA		Newman MI, Samson MC, Tamburrino JF, Swartz KA. J Reconstr Microsurg. 2010 Sep;26(7):487-92
8	Lee	US	Plast Reconstr Surg	2010	Prospective	Breast reconstruction: Perforator flap	6	ICG	Four injections of 2, 4, or 6 mg	IV	Four separate points during the procedure	FLARE	Fluorescence intensity	Assess the utility of the FLARE imaging system in evaluating perforator location and flap perfusion	1	NA	No complications	None	NA	NA		Lee BT, Hutteman M, Gioux S, Stockdale A, Lin SJ, Ngo LH, Frangioni JV. Plast Reconstr Surg. 2010 Nov;126(5):1472-81. doi: 10.1097/PRS.0b013e3181f059c7.
9	Moyer	US	Plast Reconstruct Surg	2012	Retrospective	Breast reconstruction with TE, LD flap and TRAM flap	14	ICG	5 ml	IV	Within 30 min after mastectomy and after completion and skin closure	Spy Imaging (Novadaq Technologies)	Fluorescence intensity (SPY-Q analysis software)	Association of postoperative necrosis and intraoperative perfusion percentages	90% of skin with ≤25% perfusion was not viable, 98% of skin with ≥45% survives. Cutoff of 33%: sensitivity of 84.6%, specificity of 87.5%	NA	NA	None	NA	NA	Poorly perfused tissue was resected when possible.	Moyer HR, Losken A. Plast Reconstr Surg. 2012 May;129(5):1043-8.
10	Phillips	US	Plast Reconstruct Surg	2012	Prospective	Breast reconstruction with tissue-expanders	32	ICG	17.5 mg	IV	After TE inset and skin temporarily closed using staples	Spy Imaging (Novadaq Technologies)	Fluorescence intensity (SPY-Q analysis software)	Necrosis	90% sensitivity, 50% specificity, 56% PPV and 88% NPV for necrosis Quantitive analysis for ICGA in necrotic regions showed absolute perfusion units less than 3.7, with 90% sensitiviy and 100% specificitiy	NA	NA	None	Yes	NA	Compared with clinical assessment and fluorescein dye angiography	Phillips BT, Lanier ST, Conkling N, Wang ED, Dagum AB, Ganz JC, Khan SU, Bui DT. Plast Reconstr Surg. 2012 May;129(5):778e-88e
11	Patel	US	J Plast Surg Hand Surg	2013	Retrospective	Complex abdominal wall reconstruction	5 (+12 control)	ICG	3-5 ml (2.5 mg/ml)	IV	Once before and once after pannus excision	SPY Elite (Novadaq Technologies)	Fluorescence intensity (SPY-Q analysis software)	Wound-healing complications	NA	NA	ICGA decreased wound-healing related complications (42% to 20%)	None	NA	NA		Patel KM, Bhanot P, Franklin B, Albino F, Nahabedian MY. J Plast Surg Hand Surg. 2013 Dec;47(6):476-80.
12	Sood	US	Ann Surg Innov Res	2013	Retrospective	Immediate postmastectomy breast reconstruction	39 (+52 control)	ICG	3 ml	IV	After mastectomy, prior to reconstruction	SPY Imaging (Novadaq Technologies)	Fluorescence intensity (SPY-Q analysis software)	Complications, repeat visits to the OR	5/7 subjects with complications were identified by SPY	NA	ICGA did not significantly decrease postoperative complications (36.5% to 17.9%, P=0.0631)	None	NA	NA		Sood M, Glat P. Ann Surg Innov Res. 2013 Jul 23;7(1):9.
13	Wu	US	Ann Plast Surg	2013	Retrospective	Flap surgery (various, but most in breast reconstruction)	37	ICG	3.3 or 5 mL	IV	After anastomosis or preoperatively	SPY	NA	Determine association between ICG-VA use and clinical outcomes	NA	NA	ICG-VA underestimated perfusion in pedicle and skin flaps	NA	NA	Authors opted to lease device (no cost) and pay per vial of dye (USD 1295 per vial at the time the article was written). Purchase price for device was USD 280,000 at the time the article was written.	ICG-VA provides ambiguous findings without distinct cut-off points, and added at least 20 minutes to procedure duration	Wu C, Kim S, Halvorson EG. Ann Plast Surg. 2013 May;70(5):613-9. doi: 10.1097/SAP.0b013e31827565f3.
14	Duggal	US	Aesthet Surg	2014	Retrospective	Breast reconstruction with TE, LD, TRAM, or DIEP	184 (+184 control)	ICG	NA	IV	NA	SPY Elite (Novadaq Technologies)	NA	Necrosis, complications, cost	NA	NA	ICGA decreased mastectomy skin necrosis (23.4% to 5.9%, P=0.01)	None	NA	The use of ICG angiography saved patients an average of $610.		Duggal CS, Madni T, Losken A. Aesthet Surg J. 2014 Jan 1;34(1):61-5.
15	Munabi	US	J Plast Reconstr Aesthet Surg	2014	Prospective	Breast reconstruction	42	ICG	10 mg (2.5 mg/mL)	IV	After completion of the reconstruction	SPY Elite (Novadaq Technologies)	NA	Identify ICG-VA parameters that predict mastectomy flap necrosis	NA	NA	Eight cases of necrosis (13%); two of these required outpatient revision procedures; no re-surgery required and no implant loss	NA	NA	NA		Munabi NC, Olorunnipa OB, Goltsman D, Rohde CH, Ascherman JA. J Plast Reconstr Aesthet Surg. 2014 Apr;67(4):449-55. doi: 10.1016/j.bjps.2013.12.040.
16	Bigdeli	Germany	Surg Innov	2015	Prospective	Free flap reconstructions	8	ICG	0.5 mg/kg	IV	Before suturing or after the flap was fully sutured in place	ICG-NIR-VA (Visiosense)	NA	Impact on surgical decision making, perfusion patterns	ICGA confirmed clinical examination in 7 out of 8 (87,5%) patients	25% changes in decision making (additional surgical interventions)	11% necrosis	None	NA	NA		Bigdeli AK, Gazyakan E, Schmidt VJ, Hernekamp FJ, Harhaus L, Henzler T, Kremer T, Kneser U, Hirche C. Surg Innov. 2016 Jun;23(3):249-60.
17	Valerio	US	J Reconstruct Microsurg	2015	Retrospective	Osseous flap	16	ICG	7.5 mg	IV	After flap dissection and harvest, but before parent vessel division	SPY Elite (Novadaq Technologies)	Fluorescence intensity (SPY-Q analysis software)	Necrosis, complications	NA	NA	19% complications	None	NA	NA		Valerio I, Green JM 3rd, Sacks JM, Thomas S, Sabino J, Acarturk TO. J Reconstr Microsurg. 2015 Jan;31(1):45-53
18	Colavita	US	Hernia	2016	Prospective	Complex abdominal wall reconstruction	15	ICG	5 mg	IV	Once prior to incision and once prior to closure	SPY Elite (Novadaq Technologies)	Fluorescence intensity (SPY-Q analysis software)	Necrosis and infection requiring reoperation	Sensitivity 100 % and specificity 90.9 % for predicting wound complications	NA	NA	None	NA	NA	The surgeon was not allowed to view the ICGA images	Colavita PD, Wormer BA, Belyansky I, Lincourt A, Getz SB, Heniford BT, Augenstein VA. Hernia. 2016 Feb;20(1):139-49
19	Diep	US	Ann Surg Oncol	2016	Retrospective	Skin-sparing mastectomy and TE reconstruction	61 (+53 control)	ICG	NA	IV	At the time of TE inset	Spy Imaging (Novadaq Technologies)	NA	Necrosis, complications	NA	NA	Rates of severe flap necrosis were significantly lower with ICGA (4.9% versus 18.9% P= 0.02)	None	NA	NA		Diep GK, Hui JY, Marmor S, Cunningham BL, Choudry U, Portschy PR, Tuttle TM. Ann Surg Oncol. 2016 Nov;23(12):4080-4085
20	Harless	US	Breast J	2016	Retrospective	DTI or TE Breast reconstruction	120 (+149 control)	ICG	NA	IV	Once after mastectomy and once with implant or expander inset	SPY Elite (Novadaq Technologies)	NA	Necrosis, complications	NA	NA	ICGA decreased mastectomy skin necrosis (6.7% to 0.9%, P=0.02)	None	NA	NA		Harless CA, Jacobson SR. Breast J. 2016 May;22(3):274-81
21	Hitier	France	J Craniomaxillofac Surg	2016	Prospective	Free flap reconstruction (Fibular, DIEP or ALT)	20	IFC (infracyanine)	0.025 mg/kg	IV	Directly after flap anastomosis to recipient vessel	Fluobeam (Fluoptics)	Fluorescence intensity	Vascular complications	The ideal cutoff value was 33.45GL/ms for amplitude of fluorescence intensity (100% sensitivity and 100% specificity)	NA	Vascular complications occured in all 3 patients with no fluorescence detected in flap	None	NA	NA	Compared with surgeon's clinical assessment	Hitier M, Cracowski JL, Hamou C, Righini C, Bettega G. J Craniomaxillofac Surg. 2016 Nov;44(11):1833-1841.
22	Ludolph	Germany	J Plast Reconstr Aesthet Surg	2016	Prospective	Autologous breast reconstruction with DIEP and TRAM flap	32	ICG	10 mg	IV	After dissection of the complete abdominal tissue and the donor vessel	SPY Elite (Novadaq Technologies)	Fluorescence intensity (SPY-Q analysis software)	Association with post-capillary oxygen saturation and relative haemoglobin content (rHb) using combined laser Doppler spectrophotometry, impact on flap design, postoperative complications	In 69% of cases, positive correlation was found between in ICGA and clinical evaluation	9% changes of flap design	Flap survival rate was 100%	None	NA	NA	All subject underwent clinical assessment, ICGA and combined laser Doppler Spectrophotometry (CLDS)	Ludolph I, Arkudas A, Schmitz M, Boos AM, Taeger CD, Rother U, Horch RE, Beier JP. J Plast Reconstr Aesthet Surg. 2016 Oct;69(10):1382-8
23	Rinker	US	Plast Reconstruct Surg	2016	Prospective	Immediate breast reconstruction with TE or TRAM flap	20 (+60 control)	ICG	10 ml	IV	After completion of the mastectomy	SPY Elite (Novadaq Technologies)	NA	Necrosis, reoperation	NA	NA	ICGA decreased mastectomy skin necrosis (27% to 14%, P=0.03)	None	NA	NA	Compared with 40 subjects with perfusion evaluated clinically (20) and with fluorescein dye (20)	Rinker B. Plast Reconstr Surg. 2016 Feb;137(2):395-401.
24	Wormer	US	J Surg Res	2016	RCT	Complex abdominal wall reconstruction	46 (+49 control)	ICG	5 mg	IV	Once prior to incision and once prior to closure	SPY Elite (Novadaq Technologies)	Fluorescence intensity (SPY-Q analysis software)	Flap modification, wound complications	NA	The experimental group more often had advancement flaps modified (37% versus 4.1%, P < 0.0001).	Hypoperfusion on ICGA was associated with higher rates of wound infection (28% versus 9.4%, P<0.02) ICGA did not alter postoperative wound-related complications	None	NA	NA	Compared with incision and resection based on clinical judgement alone in 49 subjects	Wormer BA, Huntington CR, Ross SW, Colavita PD, Lincourt AE, Prasad T, Sing RF, Getz SB, Belyansky I, Heniford BT, Augenstein VA. J Surg Res. 2016 May 15;202(2):461-72.
25	Gorai	Japan	Plast Reconstruct Surg	2017	Retrospective	TE breast reconstruction	81 (+100 control)	ICG	5 mg	IV	Before skin closure	Photodynamic Eye (Hamamatsu photonics)	Relative perfusion (RP); time (T) to reach RPmax; and slope (S = RP/T) reflecting the rate of increase to Rpmax	Necrosis	Specificity 98.5% and sensitivity 83.8% with curoff value 34 for relative perfusion	NA	ICGA decreased necrosis reaching the subcutaneous fat layer (17.8% to 4.8%, P <0.05)	None	NA	NA		Gorai K, Inoue K, Saegusa N, Shimamoto R, Takeishi M, Okazaki M, Nakagawa M. Plast Reconstr Surg Glob Open. 2017 Apr 21;5(4):e1321
26	Koshimune	Japan	J Reconstr Microsurg	2017	Prospective	Tissue debridement in Gustilo grade IIIB fractures	13 (+10 control)	ICG	0.2mg/kg	IV	The day after the injury evaluation of soft tissue every 48 hours	Photodynamic Eye (Hamamatsu photonics)	NA	Necrosis, deep-site infection	NA	NA	ICGA decreased remain tissue necrosis after debridement (60% to 15.4%, P=0.026), the number of debridement (2.7 to 1.69 times, P=0.016), and deep-site infections (50% to 7.6%, P=0.035)	None	NA	NA		Koshimune S, Shinaoka A, Ota T, Onoda S, Kimata Y. J Reconstr Microsurg. 2017 Feb;33(2):143-150.
27	Venturi	US	Plast Reconstr Surg	2017	Prospective	Nipple-sparing mastectomy and TE reconstruction	20	ICG	NA	IV	Immediately after mastectomy and after TE inset	SPY Elite (Novadaq Technologies)	Fluorescence intensity (SPY-Q analysis software)	Necrosis	100% sensitivity, 94% specificity for full-thickness necrosis	NA	NA	None	NA	NA		Venturi ML, Mesbahi AN, Copeland-Halperin LR, Suh VY, Yemc L. Plast Reconstr Surg Glob Open. 2017 May 23;5(5):e1334.
28	Alstrup	Denmark	J Plast Surg Hand Surg	2018	Restrospective	Immediate and delayed autologous breast reconstruction	77 (+114 control)	ICG	7.5 mg	IV	After transposition of the flap to the recipient site	SPY Elite (Novadaq Technologies)	NA	Postoperative complications	NA	NA	In immediate reconstruction, ICGA decreased major postoperative complications (14.9% to 0%, P=0.039)	None	NA	NA		Alstrup T, Christensen BO, Damsgaard TE. J Plast Surg Hand Surg. 2018 Oct;52(5):307-311
29	Hammer Hansen	Denmark	J Plast Surg Hand Surg	2018	Retrospective	Implant-based breast reconstruction	46 (+46 control)	ICG	NA	IV	Once after mastectomy, once with implant sizer and once with dermis sutured	SPY Elite (Novadaq Technologies)	NA	Necrosis	NA	NA	ICGA decreased necrosis rates requiring surgical revision (17.7% to 9.1%, P=0.149) and necrosis rates requiring conservatively treated (8.1% to 4.5%, P=0.411), however this difference was not statistically significant.	None	NA	NA		Hammer-Hansen N, Juhl AA, Damsgaard TE. J Plast Surg Hand Surg. 2018 Jun;52(3):158-162
30	Hembd	US	Plast Reconstr Surg	2018	Retrospective	DIEP flap in breast reconstruction	409 (perforator flaps) - but only 115 (31.8%) of those received ICG	ICG	NA	IV	After flap anastomosis	NA	NA	Determine prediction factors of fat necrosis and abdominal morbidity	NA	NA	ICG-VA use reduced fat necrosis (odds ratio: 0.46, p = 0.04)	NA	NA	NA		Hembd A, Teotia SS, Zhu H, Haddock NT. Plast Reconstr Surg. 2018 Sep;142(3):583-592. doi: 10.1097/PRS.0000000000004631.
31	Chattha	US	Plast Reconstr Surg	2018	Retrospective	Breast reconstruction	110,320 patients that underwent breast reconstruction: 107,005 (97%) without ICG and 3,315 (3%) with ICG	ICG	NA	IV	NA	NA	NA	Assess trends and outcomes in ICG-VA use	NA	Autologous reconstruction (4.5%) was more frequently associated with ICG-VA use than tissue expander reconstruction (2.1%) (p = 0.001); use of ICG-VA increased debridement (odds ratio: 1.404)	NA	NA	NA	This paper is a cost-analysis in 110,320 breast reconstruction procedures; use of ICG-VA increases costs and debridement but decreases the length of hospital stay. Decrease in length of stay (0.11 days) was statistically significant but may not be clinically useful and may not offset cost of ICG-VA.		Chattha A, Bucknor A, Chen AD, Lee BT, Lin SJ. Plast Reconstr Surg. 2018 Apr;141(4):825-832. doi: 10.1097/PRS.0000000000004195.
32	Malagon-Lopez	Spain	Breast	2019	Prospective	Breast reconstruction by single-perforator DIEP flap anastomosed to the internal mammary artery	41	ICG	2.5 mg	IV	When the flap was perfused by one perforator vessel and again after anastomosis to the internal mammary artery and vein	PDE NIR fluorescence imager, Hamamatsu Photonics (Hamamatsu, Japan)	NA	Determine whether ICG-VA should be performed intraoperatively on donor or recipient sites	NA	The design of the final flap was changed in 4.3% of cases	Postoperative complications: seven cases of fat necrosis, one case of skin flap necrosis, two cases of infection, and one hematoma that required surgical revision	NA	NA	NA	Performing ICG-VA on the donor site improves the planning of placement at the recipient site	Malagon-Lopez P, Carrasco-Lopez C, Garcia-Senosiain O, Vila J, Del-Rio M, Priego D, Julian-Ibanez JF, Higueras-Sune C. Breast. 2019 Oct;47:102-108. doi: 10.1016/j.breast.2019.07.009.
33	Moris	France	J Stomatol Oral Maxillofac Surg	2019	Prospective	Microsurgical flap reconstruction: including mandibular, femur, maxillary, thumb skin, and tibia reconstruction	12	ICG	0.1 mg/kg of a 2.5 mg/mL solution	IV		Fluobeam (Fluoptics)	NA	Assess the utility of ICG-VA in free-flap procedures	NA	Eight of the 12 surgeries were modified intraoperatively following ICG-VA; the changes were to modify the draw of the skin paddle, recut the paddle, modify the osteotomies, re-do the anastomosis, or modify the position of the pivot point	One patient experienced flap failure	NA	NA	NA		Moris V, Cristofari S, Stivala A, Lehre B, Gengler C, Rabuel V, Srouji A, Zwetyenga N, Guilier D. J Stomatol Oral Maxillofac Surg. 2019 Sep;120(4):297-300. doi: 10.1016/j.jormas.2019.07.006.
34	Girard	France	PLoS One	2019	Retrospective	Unilateral DIEP flap breast reconstruction	40	ICG	5 mg	IV	Before clamping the epigastric vessels at their origin, "after the main perforator had been fully dissected"	SPY Elite (Novadaq Technologies)	Dynamic color analysis	Ability of SPY-Q software to assess flap perfusion	NA	NA	Five patients (13%) required repeated surgery for venous thrombosis (n=2), arterial thrombosis (n=1), hemorrhage (n=1), and partial flap necrosis (n=1). Two of the flaps had to be removed. Abdominal scars delayed some postoperative healing	NA	NA	NA	Perfusion is impaired in diabetic patients or those receiving tamoxifen	Girard N, Delomenie M, Malhaire C, Sebbag D, Roulot A, Sabaila A, Couturaud B, Feron JG, Reyal F. PLoS One. 2019 Jun 25;14(6):e0217698. doi: 10.1371/journal.pone.0217698.
35	Abdelwahab	US	JAMA Facial Plast Surg	2019	Retrospective	Staged reconstruction of nasal defects using melolabial flaps	12 (two were later excluded because VA readings were unclear)	ICG	5 mg	IV	Before flap division	SPY Elite (Novadaq Technologies)	NA	Utility of ICG-VA in measuring melolabial flap perfusion	83% (ICG-VA was unclear for two of the 12 patients, so they were excluded from the analysis)	NA	No major complications	NA	NA	NA	ICG-VA is effective in assessing neovascularization	Abdelwahab M, Spataro EA, Kandathil CK, Most SP. JAMA Facial Plast Surg. 2019 May 1;21(3):230-236. doi: 10.1001/jamafacial.2018.1874.
36	Abdelwahab	US	JAMA Facial Plast Surg	2019	Retrospective	Staged reconstruction of nasal defects using paramedian forehead flaps	85 (but 14 were excluded)	ICG	5 mg	IV	After temporary clamping of the pedicle in removing the donor skin	SPY Elite (Novadaq Technologies)	NA	Identify quantifiable perfusion measures	ICG-VA data were good for 71 of the 85 patients (84%)	NA	One case of epidermal sloughing and one case of wound dehiscence	NA	NA	NA		Abdelwahab M, Kandathil CK, Most SP, Spataro EA. JAMA Facial Plast Surg. 2019 May 1;21(3):206-212. doi: 10.1001/jamafacial.2018.1829.
37	Malagon-Lopez	Spain	Aesthet Surg J	2019	Unclear (but appears to be retrospective)	Fat necrosis reduction in the DIEP flap following breast reconstruction	24 (+ 37 controls)	ICG	2.5 mg	IV	After flap dissection and when perfusion was based on only one perforator	PDE NIR fluorescence imager, Hamamatsu Photonics (Hamamatsu, Japan)	Fluorescence intensity	Reduce fat necrosis by using intraoperative ICG-VA	NA	NA	Use of ICA-VA reduced fat necrosis from 59.9% in controls to 29% in cases (p = 0.021); required secondary surgery rate was 45.9% in controls and 20.8% in cases	NA	NA	NA		Malagon-Lopez P, Vila J, Carrasco-Lopez C, Garcia-Senosiain O, Priego D, Julian Ibanez JF, Higueras-Sune C. Aesthet Surg J. 2019 Mar 14;39(4):NP45-NP54. doi: 10.1093/asj/sjy256.
38	Diep	US	J Plast Reconstr Aesthet Surg	2019	Retrospective	Post-mastectomy breast reconstruction	135	ICG	NA	IV	Before placement of the tissue expander	SPY (Novadaq Technologies)	NA	Patient outcomes as influenced by use of ICG-VA	NA	Rates of ischemic complications decreased once the institution implemented ICG-VA use	Some cases of flap necrosis or cellulitis; some return to surgery for hematoma or seroma	NA	The rate of ischemic complications encountered by the surgeon influences the learning curve more than the length of time performing these procedures	NA		Diep GK, Marmor S, Kizy S, Huang JL, Jensen EH, Portschy P, Cunningham B, Choudry U, Tuttle TM, Hui JYC. J Plast Reconstr Aesthet Surg. 2019 Apr;72(4):548-554. doi: 10.1016/j.bjps.2018.12.037.
NA, not available or not assessed
